# Supplementary material for: An In Silico study of TiO2 nanoparticles interaction with twenty standard amino acids in aqueous solution
Source: PubMed Central journal article supplement (PMC5121885; doi:10.1038/srep37761), 2016-11-24
Supplement: srep37761-s1.pdf [file srep37761-s1.pdf]

## Supporting Information

### **An *In Silico* study of TiO<sub>2</sub> nanoparticles interaction with twenty standard amino acids in aqueous solution**

Shengtang Liu<sup>1‡</sup>, Xuan-Yu Meng<sup>1‡</sup>, Jose M. Perez-Aguilar<sup>2</sup>, and Ruhong Zhou<sup>2,3,\*</sup>

1. School for Radiological and Interdisciplinary Sciences (RAD-X) and Collaborative Innovation Center of Radiation Medicine of Jiangsu Higher Education Institutions, Soochow University, Suzhou, China, 215123

2. Computational Biological Center, IBM Thomas J. Watson Research Center, Yorktown Heights, NY 10598, USA

3. Department of Chemistry, Columbia University, New York, NY 10027, USA

‡These authors contribute equally

\* To whom correspondence should be addressed. E-mail: [ruhongz@us.ibm.com](mailto:ruhongz@us.ibm.com) (R. H. Z.)

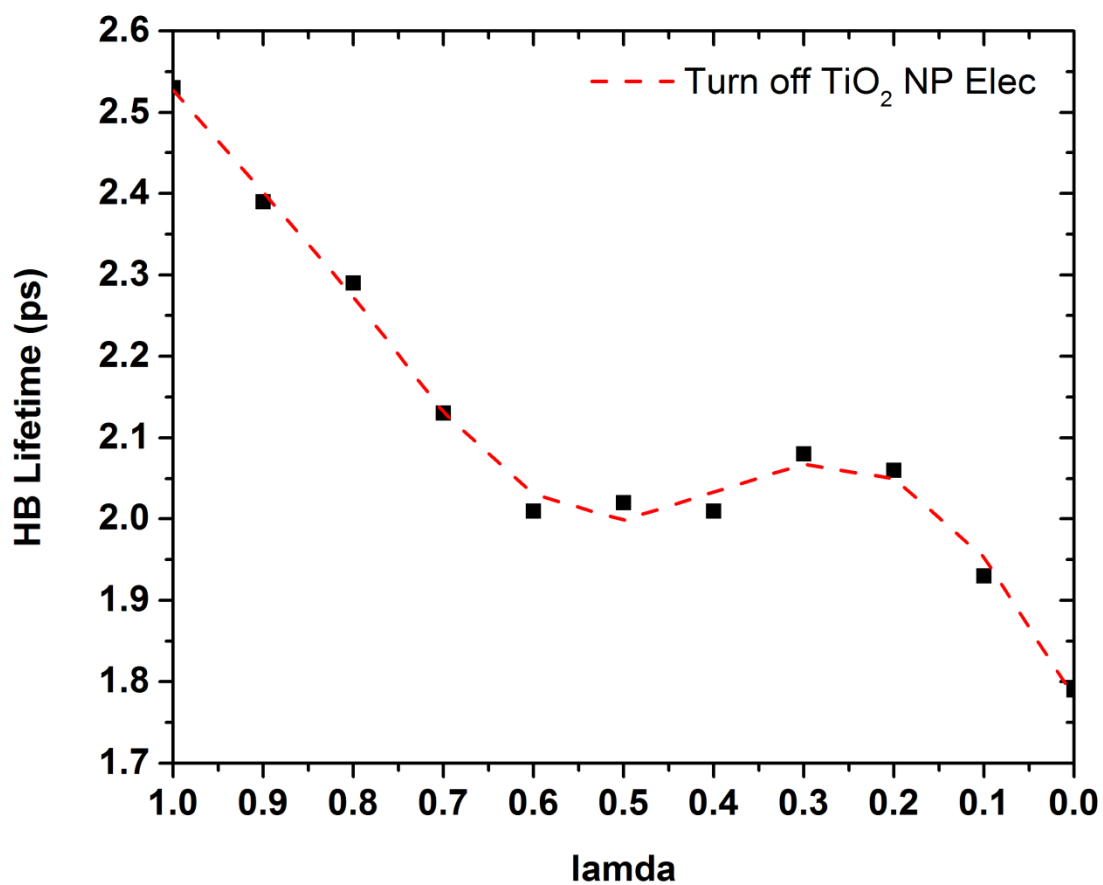

**Fig. S1.** Hydrogen bond lifetime profile when turning off TiO<sub>2</sub> NP atomic partial charges. The lamda is coefficient applied to TiO<sub>2</sub> atomic charge, lamda=1 stands for turning on atomic charge totally, lamda=0 means completely turning off the charges.

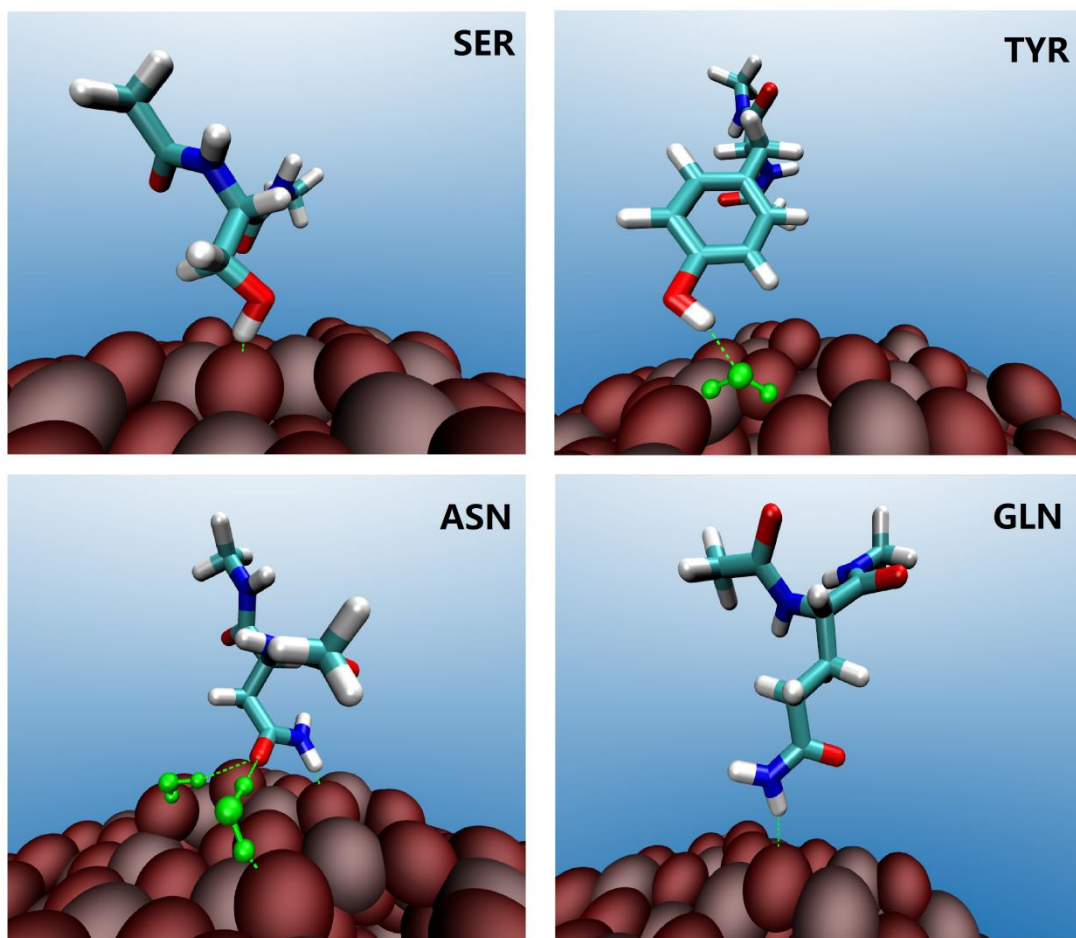

**Fig. S2.** Representative configuration of Ser, Tyr, Asn, Gln adsorbed onto the  $\text{TiO}_2$  nanoparticle surface.

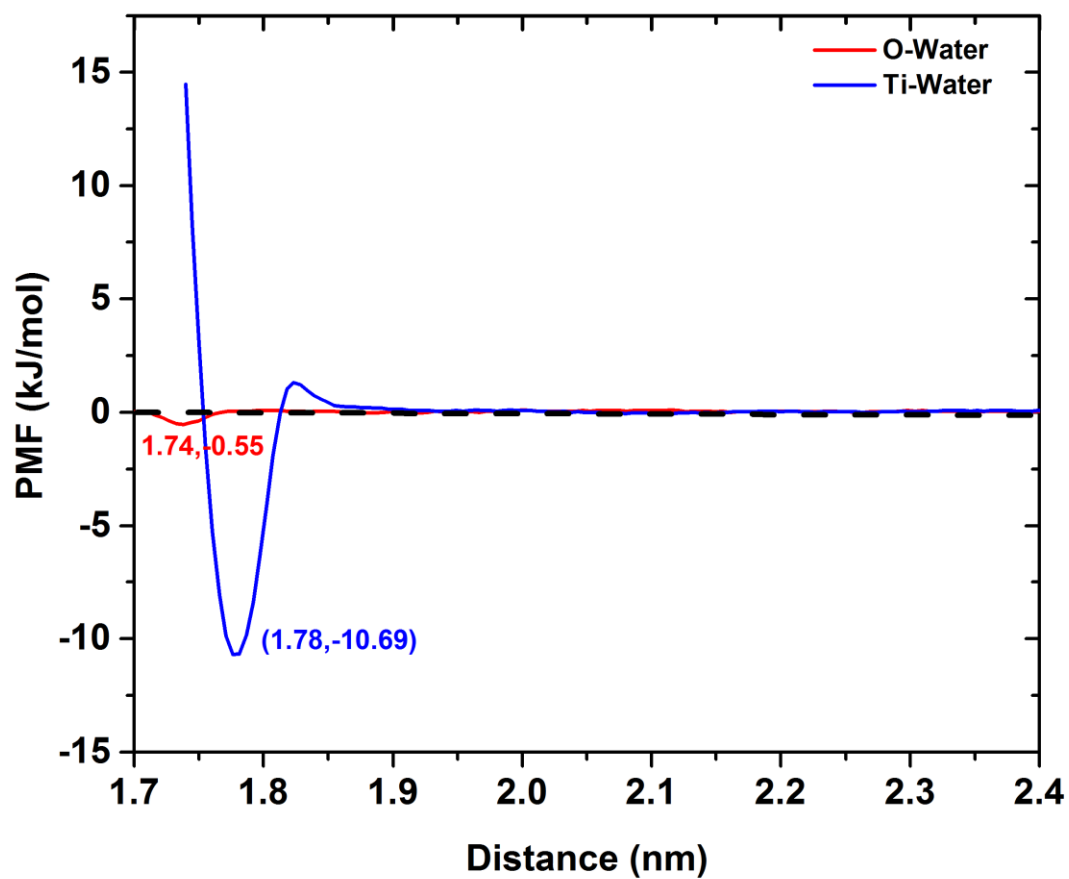

**Fig. S3.** Free energy profile of the adsorption of Ti-Water and O-Water.

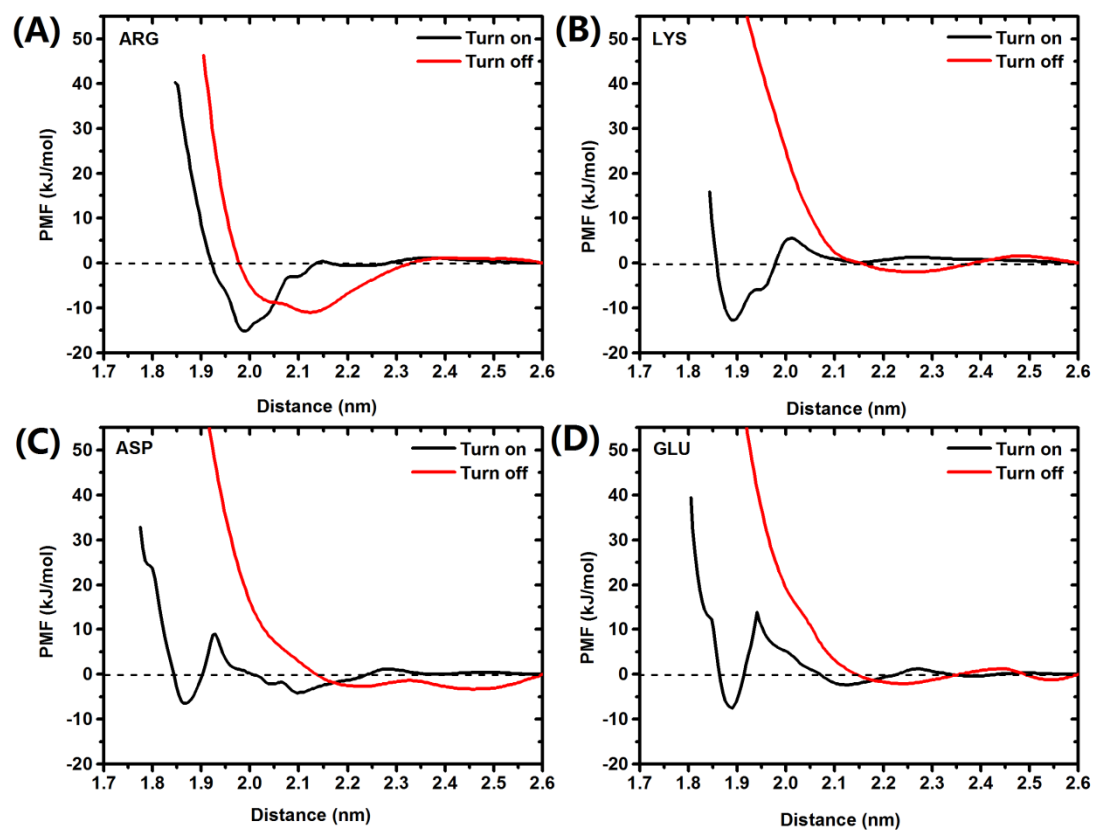

**Fig. S4.** Free energy profile of charged amino acids in the states of turn-on and turn-off TiO<sub>2</sub> NP atomic partial charge.

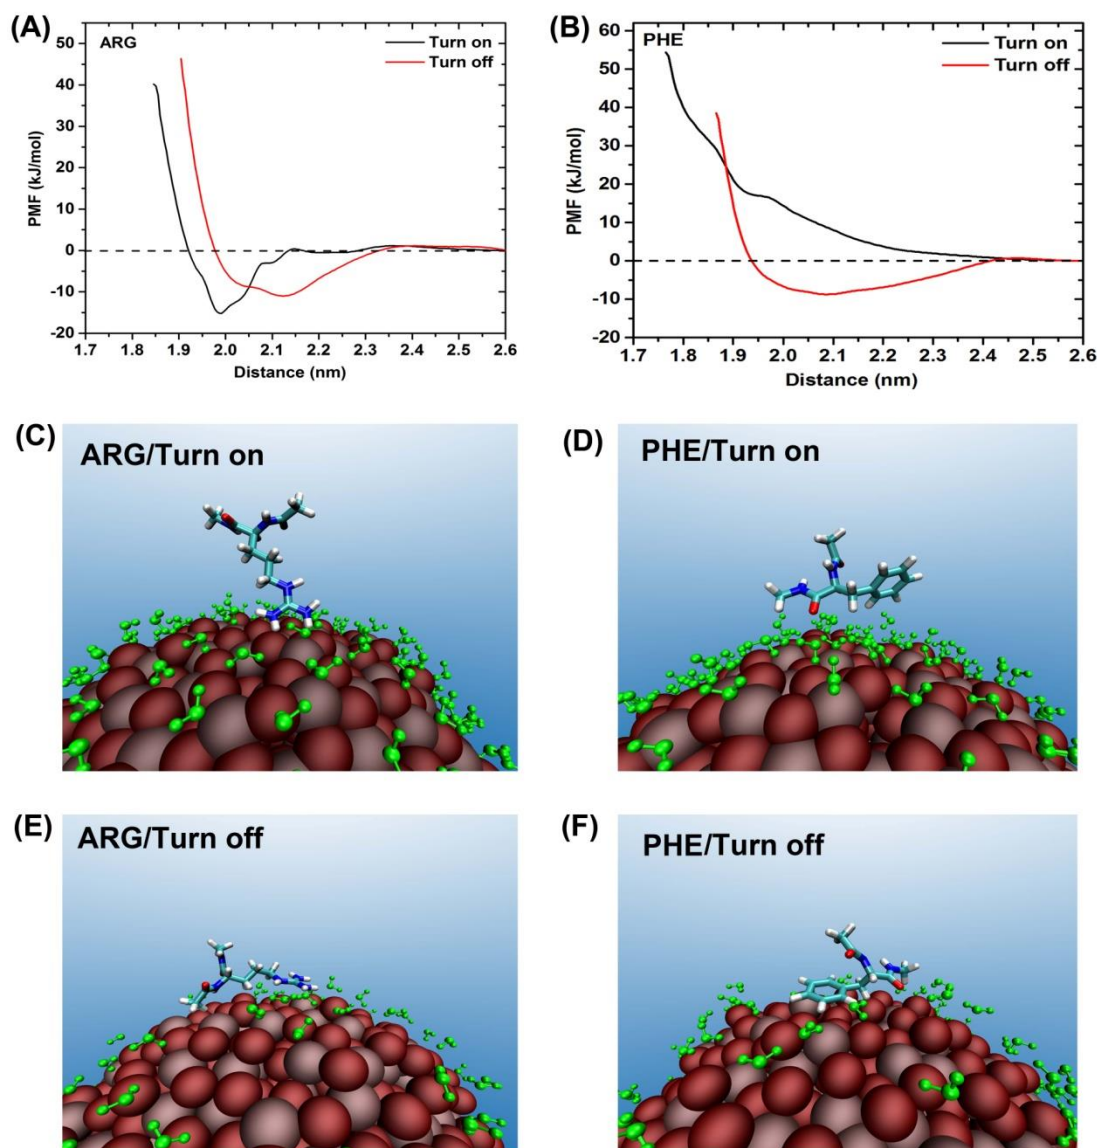

**Fig. S5.** Free energy profile of Arg and Phe when turning off TiO<sub>2</sub> NP atomic charge (A-B), and their representative configurations (C-F).
